# Supplementary material for: Regional Trends and Socioeconomic Predictors of Adolescent Pregnancy in Nigeria: A Nationwide Study
Source: MDPI journal article supplement (doi:10.3390/ijerph19138222), 2022-07-05
Supplement: s1 [file s1]

**Table S1.** Crude Odds Ratio (COR) with 95% CI for socioeconomic predictors of adolescent pregnancy by region, NDHS 2008-2018.

|                     | South West          |          | North East           |          | North West           |          | South East          |          | South South         |          | North Central       |          |
|---------------------|---------------------|----------|----------------------|----------|----------------------|----------|---------------------|----------|---------------------|----------|---------------------|----------|
| Study variables     | COR (95% CI)        | P- Value | COR (95% CI)         | P- Value | COR (95% CI)         | P- Value | COR (95% CI)        | P- Value | COR (95% CI)        | P- Value | COR (95% CI)        | P- Value |
| Year of survey      |                     |          |                      |          |                      |          |                     |          |                     |          |                     |          |
| 2008                | Reference           |          | Reference            |          | Reference            |          | Reference           |          | Reference           |          | Reference           |          |
| 2013                | 0.92 (0.60, 1.40)   | 0.690    | 0.73 (0.55, 0.97)    | 0.030    | 0.69 (0.52, 0.91)    | 0.010    | 1.01 (0.66, 1.55)   | 0.950    | 1.04 (0.71, 1.51)   | 0.840    | 0.81 (0.57, 1.17)   | 0.270    |
| 2018                | 0.60 (0.37, 0.97)   | 0.040    | 0.50 (0.37, 0.68)    | <0.001   | 0.50 (0.38, 0.64)    | <0.001   | 1.09 (0.74, 1.62)   | 0.660    | 0.88 (0.61, 1.26)   | 0.480    | 0.68 (0.51, 0.92)   | 0.010    |
| Types of residence  |                     |          |                      |          |                      |          |                     |          |                     |          |                     |          |
| Urban               | Reference           |          | Reference            |          | Reference            |          | Reference           |          | Reference           |          | Reference           |          |
| Rural               | 2.28 (1.60, 3.24)   | <0.001   | 3.16 (2.31, 4.32)    | <0.001   | 4.61 (3.49, 6.08)    | <0.001   | 1.3 (0.94, 1.8)     | 0.120    | 2.13 (1.49, 3.04)   | <0.001   | 2.2 (1.65, 2.95)    | <0.001   |
| State of residence  |                     |          |                      |          |                      |          |                     |          |                     |          |                     |          |
| State 1             | Reference           |          | Reference            |          | Reference            |          | Reference           |          | Reference           |          | Reference           |          |
| State 2             | 0.31 (0.18, 0.54)   | <0.001   | 1.00 (0.62, 1.60)    | 0.990    | 0.99 (0.68, 1.45)    | 0.960    | 0.99 (0.57, 1.74)   | 0.980    | 4.11 (2.48, 6.84)   | <0.001   | 0.23 (0.14, 0.37)   | <0.001   |
| State 3             | 0.66 (0.37, 1.20)   | 0.180    | 0.96 (0.62, 1.48)    | 0.850    | 1.17 (0.83, 1.67)    | 0.370    | 1.19 (0.74, 1.92)   | 0.480    | 3.64 (2.22, 5.99)   | <0.001   | 0.40 (0.26, 0.61)   | <0.001   |
| State 4             | 0.73 (0.43, 1.22)   | 0.230    | 1.40 (0.91, 2.14)    | 0.130    | 1.08 (0.77, 1.50)    | 0.650    | 1.53 (0.92, 2.55)   | 0.100    | 2.27 (1.25, 4.13)   | 0.010    | 0.31 (0.20, 0.49)   | <0.001   |
| State 5             | 0.22 (0.12, 0.41)   | <0.001   | 2.35 (1.53, 3.59)    | <0.001   | 0.66 (0.46, 0.95)    | 0.030    | 1.06 (0.57, 1.98)   | 0.850    | 4.84 (2.97, 7.89)   | <0.001   | 0.62 (0.41, 0.94)   | 0.030    |
| State 6             | 0.71 (0.44, 1.17)   | 0.180    | 0.90 (0.58, 1.39)    | 0.630    | 0.78 (0.53, 1.15)    | 0.210    |                     |          | 1.93 (1.09, 3.42)   | 0.030    | 0.50 (0.33, 0.76)   | <0.001   |
| State 7             |                     |          |                      |          | 0.80 (0.55, 1.14)    | 0.220    |                     |          |                     |          | 0.38 (0.22, 0.67)   | <0.001   |
| Wealth index        |                     |          |                      |          |                      |          |                     |          |                     |          |                     |          |
| Richest             | Reference           |          | Reference            |          | Reference            |          | Reference           |          | Reference           |          | Reference           |          |
| Richer              | 2.68 (1.67, 4.31)   | <0.001   | 4.23 (2.15, 8.33)    | <0.001   | 3.29 (2.06, 5.27)    | <0.001   | 2.84 (1.63, 4.94)   | <0.001   | 2.69 (1.73, 4.16)   | <0.001   | 3.45 (2.08, 5.71)   | <0.001   |
| Middle              | 2.67 (1.63, 4.38)   | <0.001   | 6.13 (2.96, 12.69)   | <0.001   | 7.8 (4.94, 12.33)    | <0.001   | 3.5 (2.02, 6.05)    | <0.001   | 4.07 (2.59, 6.40)   | <0.001   | 4.40 (2.63, 7.37)   | <0.001   |
| Poorer              | 4.96 (2.94, 8.36)   | <0.001   | 10.35 (4.95, 21.62)  | <0.001   | 11.79 (7.56, 18.38)  | <0.001   | 3.74 (2.12, 6.59)   | <0.001   | 4.29 (2.63, 6.98)   | <0.001   | 6.77 (4.09, 11.2)   | <0.001   |
| Poorest             | 9.4 (4.47, 19.80)   | <0.001   | 11.68 (5.66, 24.10)  | <0.001   | 12.86 (8.34, 19.84)  | <0.001   | 2.63 (1.14, 6.1)    | 0.020    | 10.58 (5.47, 20.44) | <0.001   | 11.68 (6.72, 20.29) | <0.001   |
| Age of respondents  |                     |          |                      |          |                      |          |                     |          |                     |          |                     |          |
| 15                  | Reference           |          | Reference            |          | Reference            |          | Reference           |          | Reference           |          | Reference           |          |
| 16                  | 2.44 (1.10, 5.39)   | 0.030    | 2.71 (1.89, 3.89)    | <0.001   | 3.69 (2.78, 4.88)    | <0.001   | 3.98 (1.21, 13.15)  | 0.020    | 2.77 (1.44, 5.31)   | <0.001   | 1.72 (0.97, 3.04)   | 0.060    |
| 17                  | 2.66 (1.23, 5.76)   | 0.010    | 7.38 (5.28, 10.31)   | <0.001   | 8.47 (6.50, 11.04)   | <0.001   | 7.7 (2.55, 23.22)   | <0.001   | 4.94 (2.66, 9.18)   | <0.001   | 5.01 (3.15, 7.98)   | <0.001   |
| 18                  | 9.58 (4.92, 18.65)  | <0.001   | 10.68 (7.85, 14.52)  | <0.001   | 15.13 (11.69, 19.59) | <0.001   | 21.22 (7.25, 62.11) | <0.001   | 7.52 (4.30, 13.14)  | <0.001   | 10.85 (6.88, 17.12) | <0.001   |
| 19                  | 13.78 (7.05, 26.93) | <0.001   | 16.97 (11.83, 24.36) | <0.001   | 18.85 (14.16, 25.09) | <0.001   | 30.22 (10.3, 88.69) | <0.001   | 15.67 (8.89, 27.62) | <0.001   | 17.14 (10.7, 27.46) | <0.001   |
| Education level     |                     |          |                      |          |                      |          |                     |          |                     |          |                     |          |
| Secondary or higher | Reference           |          | Reference            |          | Reference            |          | Reference           |          | Reference           |          | Reference           |          |
| Primary             | 4.40 (2.84, 6.82)   | <0.001   | 3.91 (2.88, 5.31)    | <0.001   | 5.30 (4.09, 6.88)    | <0.001   | 1.88 (1.24, 2.84)   | <0.001   | 3.08 (2.27, 4.18)   | <0.001   | 2.95 (2.21, 3.93)   | <0.001   |
| No education        | 9.78 (6.48, 14.76)  | <0.001   | 7.29 (5.59, 9.50)    | <0.001   | 9.66 (7.84, 11.91)   | <0.001   | 5.83 (2.1, 16.24)   | <0.001   | 3.54 (1.32, 9.47)   | 0.010    | 7.39 (5.4, 10.12)   | <0.001   |
| Access to Radio     |                     |          |                      |          |                      |          |                     |          |                     |          |                     |          |

|                       |                   |        |                   |        |                   |        |                   |        |                   |        |                   |        |
|-----------------------|-------------------|--------|-------------------|--------|-------------------|--------|-------------------|--------|-------------------|--------|-------------------|--------|
| Yes                   | Reference         |        |
| No                    | 1.09 (0.74, 1.61) | 0.660  | 1.26 (1.05, 1.51) | 0.010  | 1.02 (0.86, 1.20) | 0.850  | 1.23 (0.88, 1.71) | 0.220  | 1.63 (1.28, 2.08) | <0.001 | 1.97 (1.62, 2.41) | <0.001 |
| Access to Television  |                   |        |                   |        |                   |        |                   |        |                   |        |                   |        |
| Yes                   | Reference         |        |
| No                    | 2.49 (1.72, 3.60) | <0.001 | 2.81 (2.16, 3.66) | <0.001 | 2.94 (2.41, 3.59) | <0.001 | 1.57 (1.15, 2.15) | 0.010  | 2.23 (1.68, 2.97) | <0.001 | 3.01 (2.38, 3.81) | <0.001 |
| Access to Newspaper   |                   |        |                   |        |                   |        |                   |        |                   |        |                   |        |
| Yes                   | Reference         |        |
| No                    | 3.06 (1.96, 4.77) | <0.001 | 4.61 (2.83, 7.51) | <0.001 | 5.49 (3.94, 7.66) | <0.001 | 1.94 (1.37, 2.75) | <0.001 | 2.70 (1.90, 3.82) | <0.001 | 4.97 (3.25, 7.60) | <0.001 |
| Sex of household head |                   |        |                   |        |                   |        |                   |        |                   |        |                   |        |
| Female                | Reference         |        |
| Male                  | 1.44 (1.00, 2.07) | 0.050  | 4.00 (2.63, 6.09) | <0.001 | 1.88 (1.37, 2.58) | <0.001 | 0.82 (0.59, 1.14) | 0.250  | 0.86 (0.65, 1.14) | 0.300  | 2.63 (1.96, 3.54) | <0.001 |

COR=Crude Odds Ratio, CI=Confidence Interval
